# Supplementary material for: Liquid–liquid phase separation facilitates the biogenesis of secretory storage granules
Source: PubMed Central journal article supplement (PMC9526250; doi:10.1083/jcb.202206132), 2022-09-29

# Source Data F4

$\alpha$ -GFP

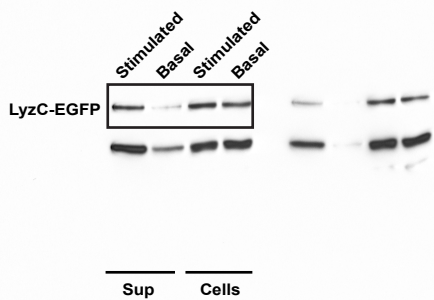

Membrane ( $\alpha$ -GFP)

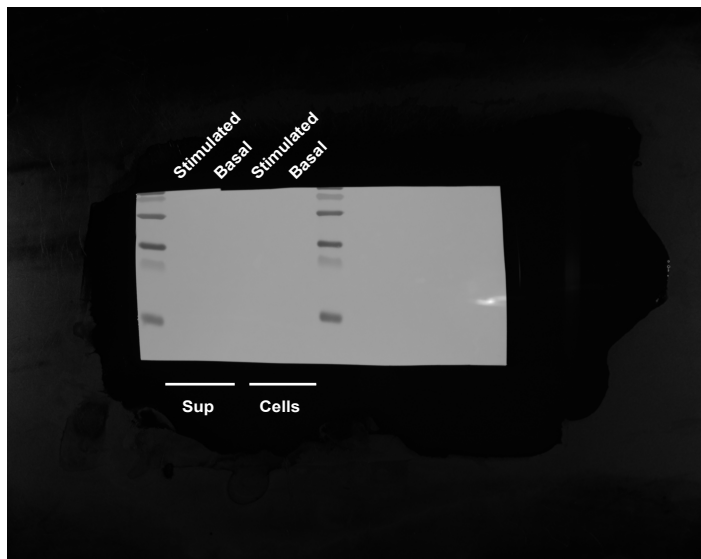

$\alpha$ -SNAP tag

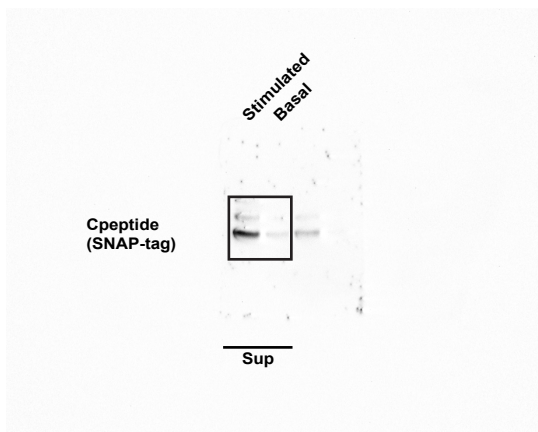

Membrane ( $\alpha$ -SNAP tag)

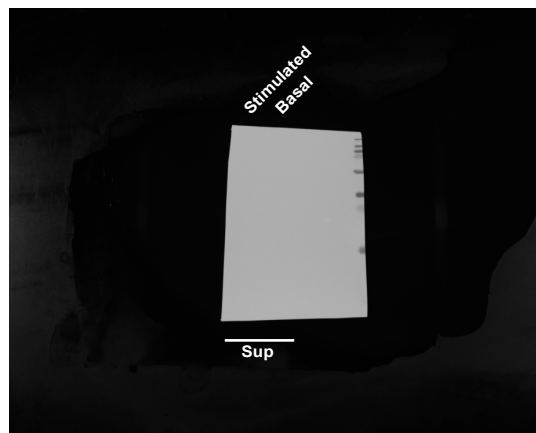

$\alpha$ -Actin

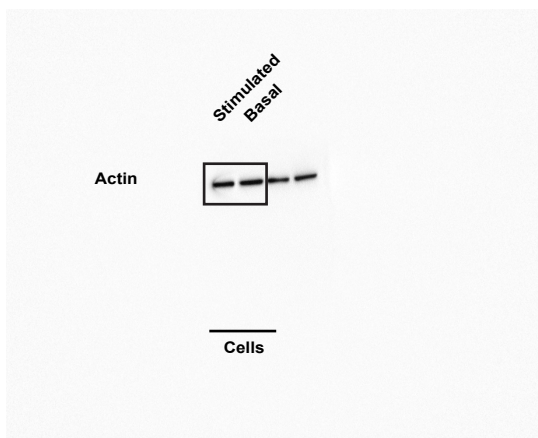

Membrane ( $\alpha$ -Actin)

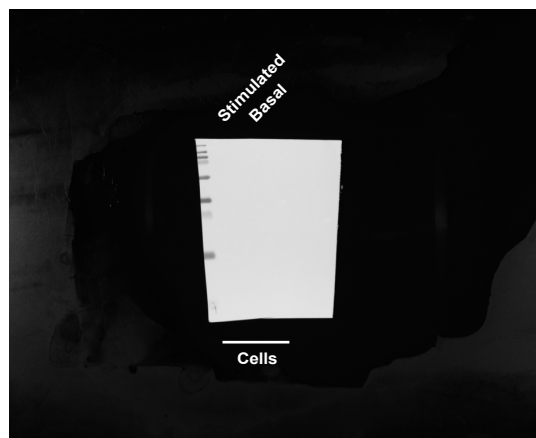

Supplement: JCB_202206132_SourceDataF4.pdf [file JCB_202206132_SourceDataF4.pdf]
