# Supplementary material for: Liquid–liquid phase separation facilitates the biogenesis of secretory storage granules
Source: PubMed Central journal article supplement (PMC9526250; doi:10.1083/jcb.202206132), 2022-09-29

# Source Data FS1

CGA-GFP

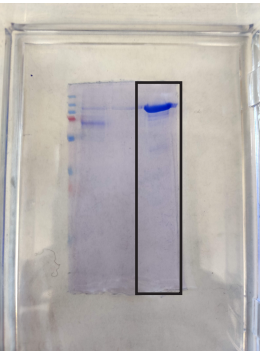

Supplement: JCB_202206132_SourceDataFS1.pdf [file JCB_202206132_SourceDataFS1.pdf]
