# Supplementary material for: Liquid–liquid phase separation facilitates the biogenesis of secretory storage granules
Source: PubMed Central journal article supplement (PMC9526250; doi:10.1083/jcb.202206132), 2022-09-29

# Source Data SF3

$\alpha$ -CGB

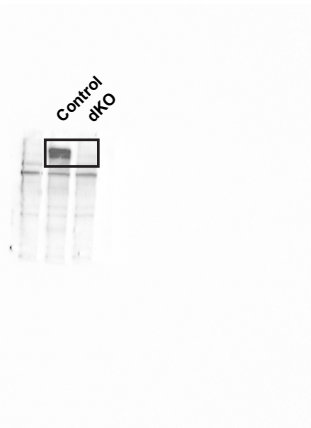

Membrane ( $\alpha$ -CGB)

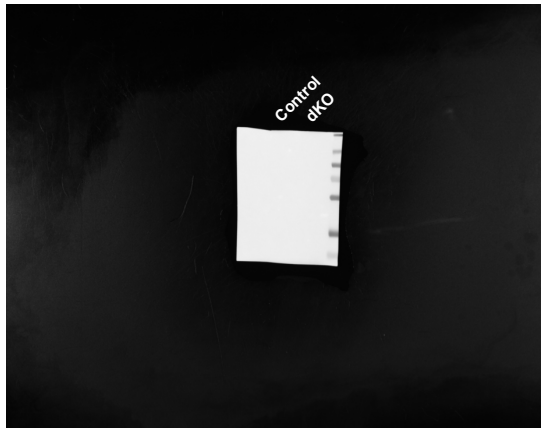

$\alpha$ -Actin

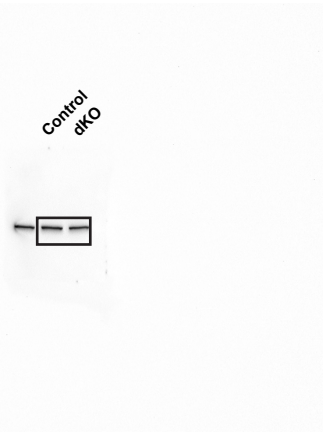

Membrane ( $\alpha$ -Actin)

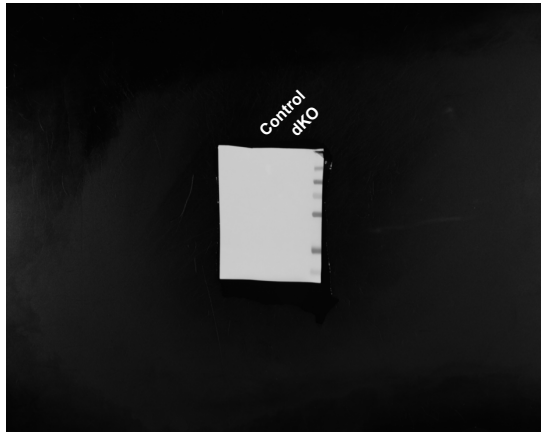

Supplement: JCB_202206132_SourceDataFS3.pdf [file JCB_202206132_SourceDataFS3.pdf]
